# Supplementary material for: Integration of Deep Learning with Molecular Docking and Molecular Dynamics Simulation for Novel TNF-α-Converting Enzyme Inhibitors
Source: MDPI journal article supplement (doi:10.3390/futurepharmacol5040055), 2025-09-23
Supplement: s1 [file futurepharmacol-3790870-supplementary.pdf › futurepharmacol-3790870-supplementary.pdf]

**Table S1.** The docking results of all docked compounds.

| Sr No | Compounds   | CDocker Energy<br>(kcal/mol) | CDocker Interaction Energy<br>(kcal/mol) |
|-------|-------------|------------------------------|------------------------------------------|
| 1     | Z2242870510 | -56.1411                     | -72.0739                                 |
| 2     | Z1459964184 | -56.1093                     | -65.4403                                 |
| 3     | Z1450394746 | -52.6466                     | -56.5756                                 |
| 4     | Z1528724474 | -52.2466                     | -69.9404                                 |
| 5     | Z1528728414 | -51.9493                     | -73.4986                                 |
| 6     | Z1459911657 | -50.9891                     | -66.7749                                 |
| 7     | Z1459944817 | -49.8452                     | -52.6715                                 |
| 8     | Z1528733448 | -49.6324                     | -63.3844                                 |
| 9     | Z1528732470 | -49.4855                     | -67.4339                                 |
| 10    | Z1528730729 | -48.544                      | -58.1347                                 |
| 11    | Z1486429255 | -47.0096                     | -56.6088                                 |
| 12    | BMS-561392  | -46.8811                     | -84.7487                                 |
| 13    | Z1528724087 | -45.5471                     | -56.6246                                 |
| 14    | Z1528722648 | -45.0183                     | -58.5849                                 |
| 15    | Z1459955640 | -44.7217                     | -64.3175                                 |
| 16    | Z1528732297 | -44.5959                     | -54.4538                                 |
| 17    | Z1491313606 | -43.8655                     | -50.3304                                 |
| 18    | Z1528733542 | -43.8502                     | -57.9296                                 |
| 19    | Z1459955208 | -43.4574                     | -59.0217                                 |
| 20    | Z1459953090 | -43.1834                     | -62.9099                                 |
| 21    | Z1528725731 | -43.0169                     | -60.2798                                 |
| 22    | Z1459952980 | -42.9628                     | -59.5152                                 |
| 23    | Z1458553178 | -42.6636                     | -52.0732                                 |
| 24    | Z1528734250 | -42.3583                     | -69.7425                                 |
| 25    | Z1491321704 | -42.2492                     | -60.9035                                 |
| 26    | Z1528729529 | -42.2076                     | -55.3135                                 |
| 27    | Z1528726287 | -42.0067                     | -59.5588                                 |
| 28    | Z1528737526 | -41.6156                     | -55.3821                                 |
| 29    | Z1528726184 | -40.6665                     | -53.6412                                 |
| 30    | Z1622768502 | -39.9682                     | -48.3745                                 |
| 31    | Z1450135453 | -39.6709                     | -47.2973                                 |
| 32    | Z1491241365 | -39.3967                     | -52.7198                                 |
| 33    | Z1621453431 | -39.2137                     | -50.9913                                 |
| 34    | Z667709452  | -39.2060                     | -44.0101                                 |
| 35    | Z1528740074 | -39.0508                     | -67.6253                                 |
| 36    | Z1528730817 | -38.8585                     | -59.1904                                 |
| 37    | Z1528729903 | -38.5904                     | -59.9200                                 |
| 38    | Z979204300  | -38.1088                     | -48.2060                                 |
| 39    | Z1459953672 | -37.6721                     | -64.0687                                 |
| 40    | Z56763116   | -37.6049                     | -47.9984                                 |
| 41    | Z1459952715 | -36.9106                     | -53.6551                                 |
| 42    | Z1695669925 | -36.6018                     | -52.6710                                 |
| 43    | Z56802949   | -35.2797                     | -49.6022                                 |
| 44    | Z1528726887 | -35.2758                     | -61.4161                                 |
| 45    | Z1486428487 | -34.9859                     | -43.8406                                 |
| 46    | Z1528731677 | -34.7250                     | -58.2018                                 |
| 47    | Z1528722614 | -33.0695                     | -55.3592                                 |

|    |             |          |          |
|----|-------------|----------|----------|
| 48 | Z1459910880 | -32.6047 | -53.4811 |
| 49 | Z1459306382 | -32.5517 | -49.2233 |
| 50 | Z1459945323 | -32.4056 | -51.8606 |
| 51 | Z1459914020 | -32.1744 | -51.5033 |
| 52 | Z1528736538 | -31.9258 | -54.5133 |
| 53 | Z1528732695 | -31.9127 | -48.6324 |
| 54 | Z1528723401 | -31.6443 | -57.6362 |
| 55 | Z1528734882 | -31.6401 | -60.8797 |
| 56 | Z1458344695 | -31.4082 | -51.6604 |
| 57 | Z1528732030 | -31.3666 | -58.3274 |
| 58 | Z1528730876 | -31.3521 | -53.3940 |
| 59 | Z1528727670 | -31.2591 | -54.8110 |
| 60 | Z1528724522 | -30.8516 | -59.8383 |
| 61 | Z1457193774 | -30.8079 | -42.8165 |
| 62 | Z1528738940 | -30.7302 | -52.4363 |
| 63 | Z1528730067 | -30.4646 | -55.8875 |
| 64 | Z1459081038 | -30.4476 | -48.5450 |
| 65 | Z1528736555 | -29.8198 | -51.7578 |
| 66 | Z1528722556 | -29.6731 | -57.4893 |
| 67 | Z1528736331 | -29.6270 | -53.3223 |
| 68 | Z1491321964 | -29.4821 | -46.6184 |
| 69 | Z1528734470 | -29.4425 | -55.3997 |
| 70 | Z1458074734 | -29.0939 | -51.2035 |
| 71 | Z1457276435 | -28.9624 | -40.7601 |
| 72 | Z1528728186 | -28.2151 | -48.9408 |
| 73 | Z1459910377 | -28.1492 | -52.7709 |
| 74 | Z1491221067 | -28.1075 | -51.9295 |
| 75 | Z1491312739 | -28.0775 | -41.7890 |
| 76 | Z1528726247 | -27.8184 | -52.2633 |
| 77 | Z1993928589 | -27.4417 | -41.7910 |
| 78 | Z1528727868 | -27.3812 | -51.2344 |
| 79 | Z1491220628 | -27.3079 | -42.9765 |
| 80 | Z1491264267 | -27.1198 | -44.5754 |
| 81 | Z1491215394 | -26.3354 | -42.8602 |
| 82 | Z1491307303 | -24.7848 | -41.1394 |
| 83 | Z1528729800 | -24.7500 | -50.7507 |
| 84 | Z1443588461 | -24.1052 | -41.8651 |
| 85 | Z1491321366 | -23.9678 | -41.0930 |
| 86 | Z89390634   | -22.8471 | -38.6707 |
| 87 | Z1491257605 | -20.9383 | -53.2652 |
| 88 | Z1528730726 | -20.2330 | -52.5102 |
| 89 | Z1491241327 | -19.8711 | -50.0200 |
| 90 | Z1491262029 | -19.7867 | -50.8186 |
| 91 | Z1491263672 | -18.6922 | -38.916  |
| 92 | Z1528725798 | -18.5928 | -60.7712 |
| 93 | Z1460003853 | -16.8643 | -58.3594 |
| 94 | Z1491212758 | -15.9168 | -51.6058 |
| 95 | Z1491300930 | -15.3511 | -52.1074 |
| 96 | Z1491270786 | -10.8387 | -49.7823 |
| 97 | Z1491353920 | -9.61124 | -46.2699 |
| 98 | Z56849813   | 7.09941  | -36.8655 |

**Table S2.** Molecular docking comparison of screened compounds.

| Compounds        | CDocker energy<br>(kcal/mol) | PyRex Docking<br>(kcal/mol) | GNINA<br>(kcal/mol) |
|------------------|------------------------------|-----------------------------|---------------------|
| Z2242870510      | -56.1411                     | -5.9                        | -9.10               |
| Z1459964184      | -56.1093                     | -6.0                        | -9.45               |
| Z1450394746      | -52.6466                     | -5.7                        | -9.08               |
| Z1528724474      | -52.2466                     | -4.9                        | -8.33               |
| Z1528728414      | -51.9493                     | -5.4                        | -9.76               |
| Z1459911657      | -50.9891                     | -5.5                        | -8.68               |
| Z1459944817      | -49.8452                     | -5.1                        | -7.46               |
| Z1528733448      | -49.6324                     | -4.6                        | -8.12               |
| Z1528732470      | -49.4855                     | -5.4                        | -7.78               |
| Z1528730729      | -48.5440                     | -4.7                        | -6.75               |
| Z1486429255      | -47.0096                     | -5.4                        | -6.51               |
| BMS-561392 (Ref) | -46.8811                     | -6.4                        | -12.1               |
| Z1528724087      | -45.5471                     | -5.0                        | -6.41               |
| Z1528722648      | -45.0183                     | -5.2                        | -8.68               |
| Z1459955640      | -44.7217                     | -4.7                        | -8.43               |

Ref: The reference compound BMS-561392.

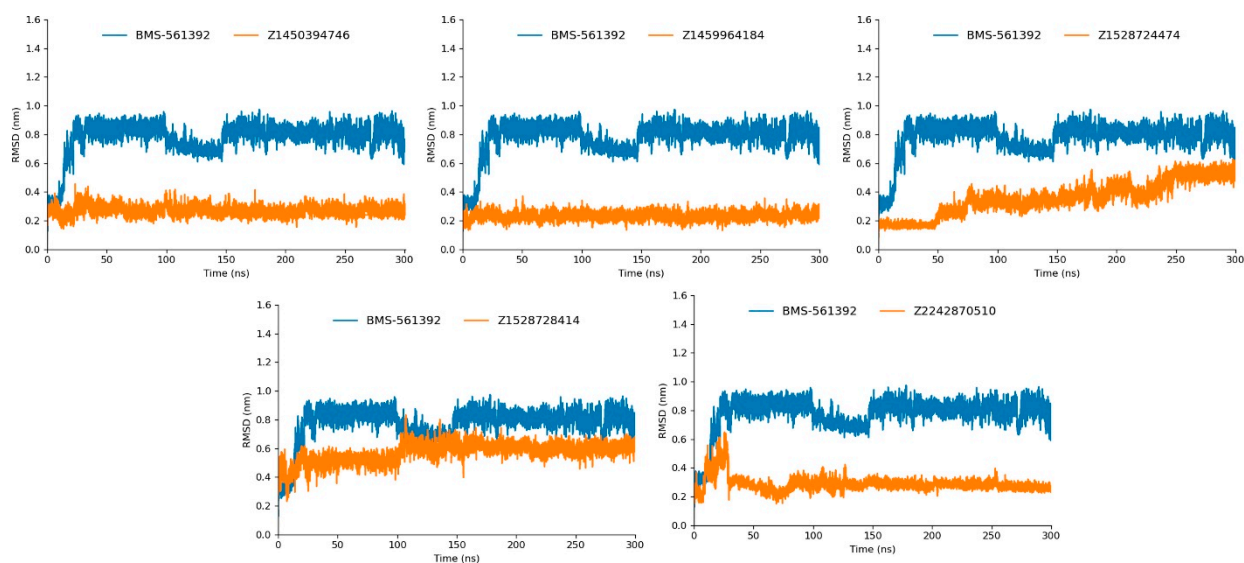

**Figure S1.** RMSD comparison of each screened enamine compound against the reference compound.

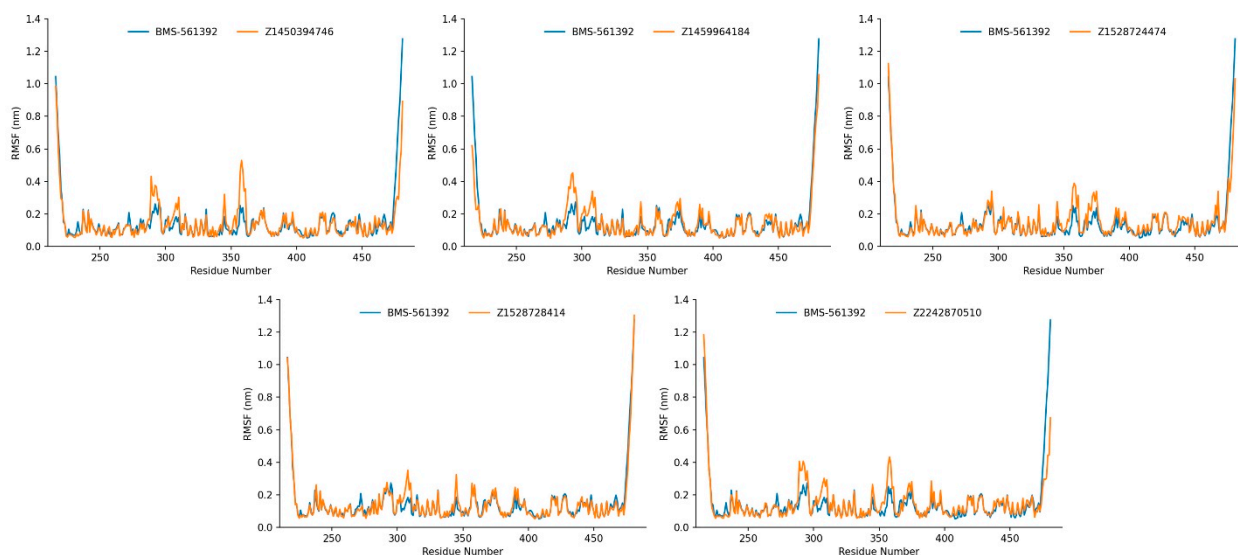

**Figure S2.** RMSF comparison of the top enamine compound against the reference compound.

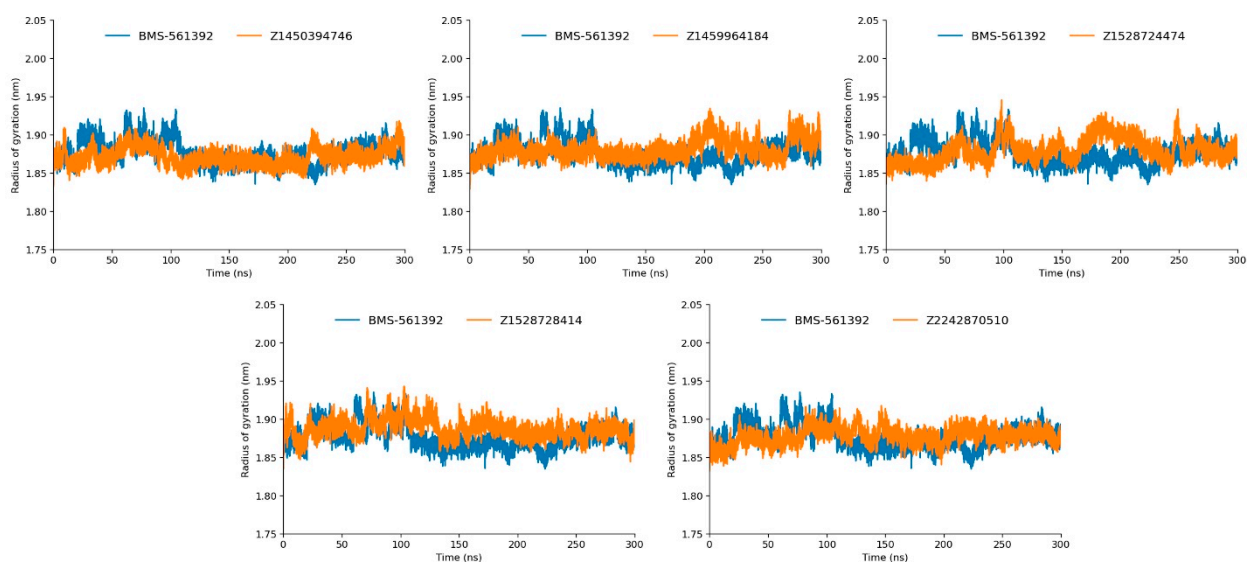

**Figure S3.**  $R_g$  comparison of the top screened enamine compound against the reference compound.

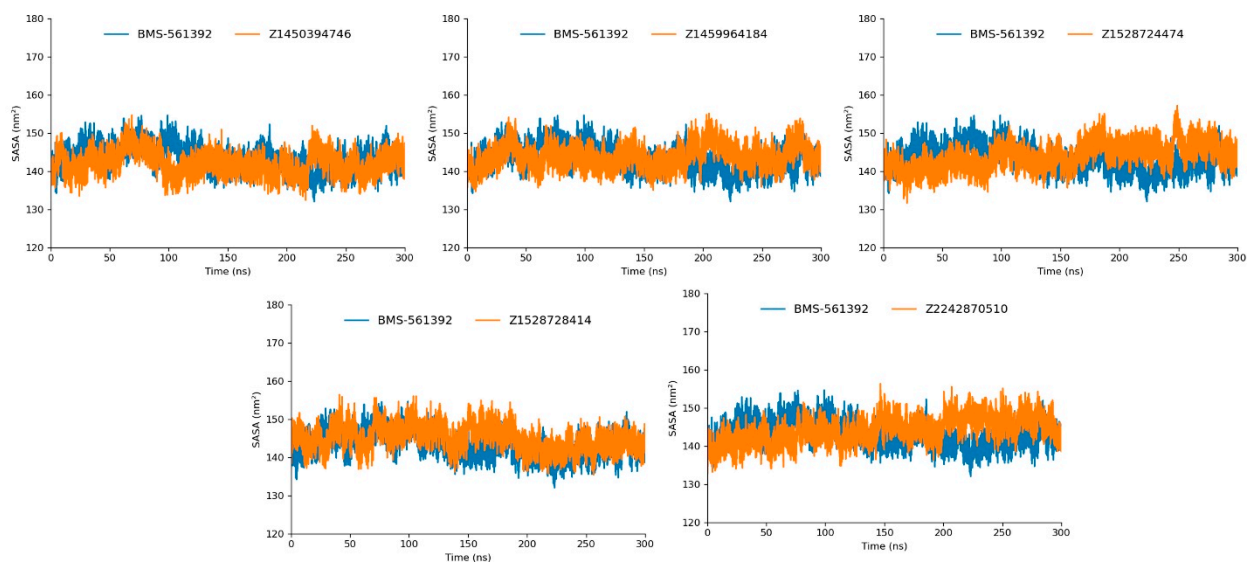

**Figure S4.** SASA plot comparison of the top screened enamine compound against the reference compound.

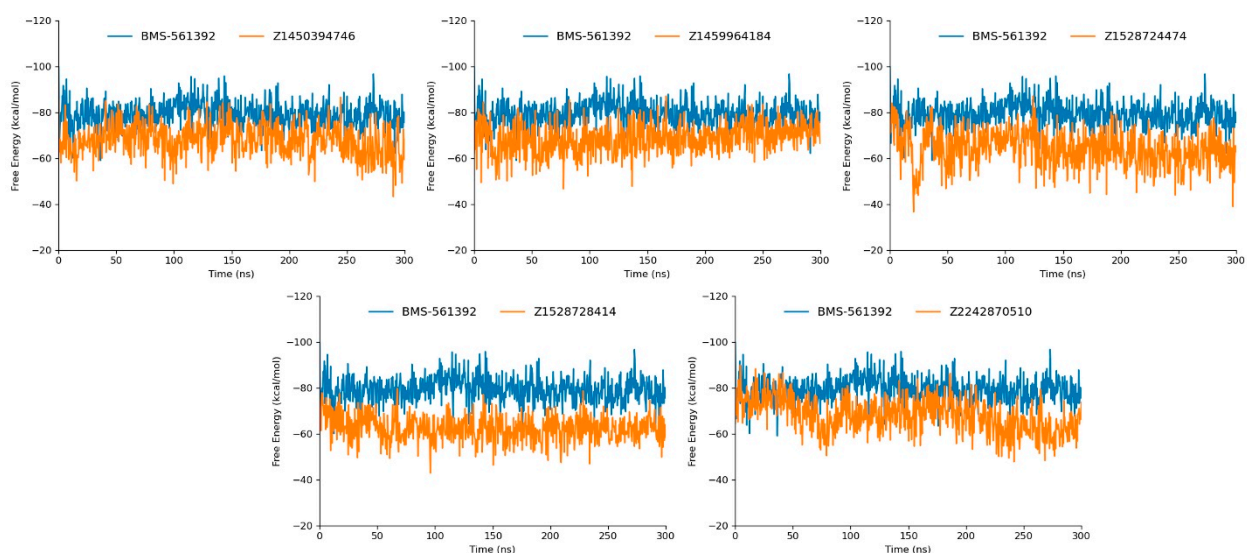

**Figure S5.** The graphs manifest the gmxMMPBSA free energy comparison of the screened enamine compounds with the reference compound.
